# Supplementary material for: Evaluation of Hydroxyl Radical Reactivity by Thioether Group Proximity in Model Peptide Backbone: Methionine versus S-Methyl-Cysteine
Source: MDPI journal article supplement (doi:10.3390/ijms23126550), 2022-06-11
Supplement: s1 [file s1]

# Supplementary Materials

Chrysostomos Chatgililoglu \*, Magdalena Grzelak , Konrad Skotnicki , Piotr Filipiak ,  
Franciszek Kazmierczak , Gordon L. Hug , Krzysztof Bobrowski \* and Bronislaw Marciniak \*

\* Correspondence: chrys@isof.cnr.it (CC); kris@ichtj.pl (KB); marcinia@amu.edu.pl; (BM)

| Contents   | pages  |
|------------|--------|
| Figures S1 | S2     |
| Figures S2 | S3     |
| Table S1   | S4     |
| Figure S3  | S5     |
| Figure S4  | S6     |
| Scheme S1  | S7     |
| Figure S5  | S8-S11 |
| Figure S6  | S12    |
| Table S2   | S13    |
| Figure S7  | S14    |
| Figure S8  | S15    |
| Scheme S2  | S16    |
| Figure S9  | S17    |

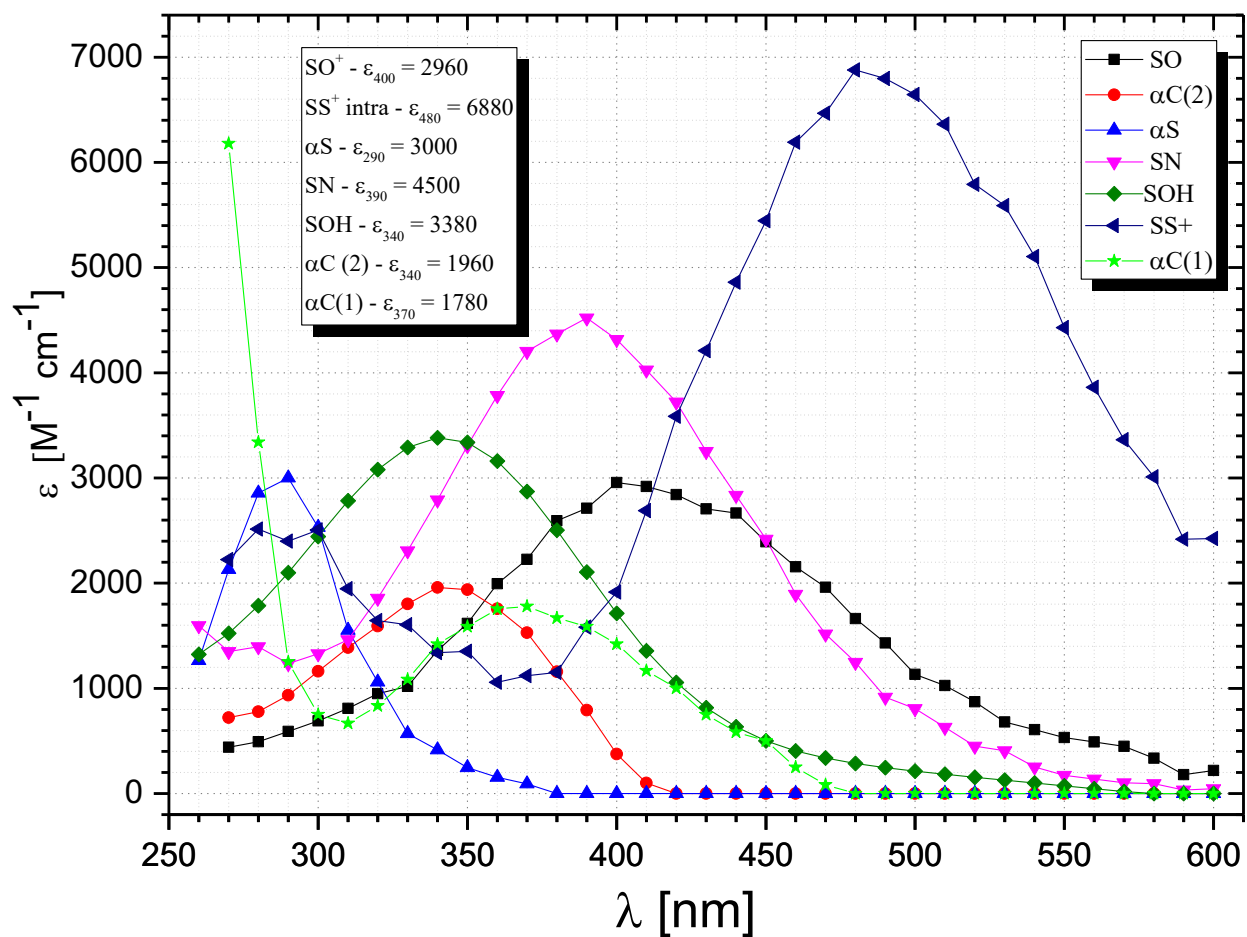

**Figure S1.** Reference spectra used in the resolution of the transient absorption spectra following  $\bullet\text{OH}$ -induced oxidation of Met-containing derivative **1** and methylated Cys derivative **2**.

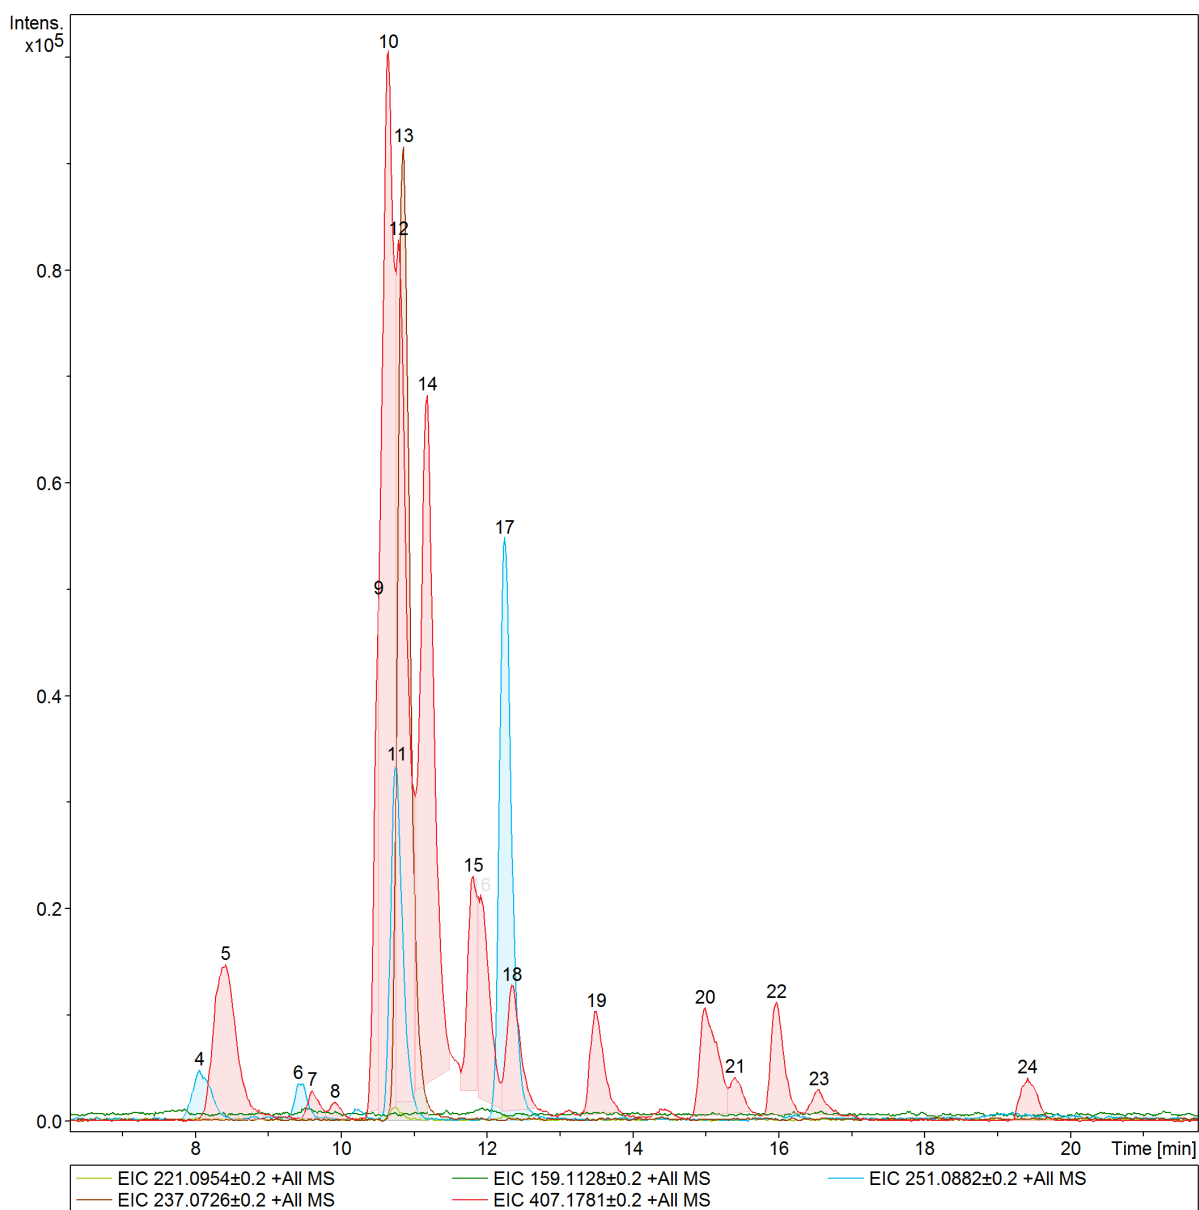

**Figure S2.** Fragments of LC-MS analysis for Met-containing derivative **1** after irradiation at 800 Gy at pH 7

**Table S1.** Conversion of Met derivative 1 (peak 3) after irradiation at 800 Gy at pH 7. The peaks 4-24 are shown in Figure S1.

| Peak           | RT [min] <sup>b</sup> | Peak Intensity <sup>c</sup> | MH <sup>+</sup> , <i>m/z</i> |
|----------------|-----------------------|-----------------------------|------------------------------|
| 1              | 1.1                   | 254430                      | 221.0954                     |
| 2              | 1.4                   | 62161                       | 159.1128                     |
| 3 <sup>a</sup> | 3.1                   | 2954972                     | 205.1005                     |
| 4              | 8.1                   | 4812                        | 251.0882                     |
| 5              | 8.4                   | 14720                       | 407.1781                     |
| 6              | 9.4                   | 3558                        | 251.0882                     |
| 7              | 9.6                   | 2876                        | 407.1781                     |
| 8              | 9.9                   | 1777                        | 407.1781                     |
| 9              | 10.5                  | 49076                       | 407.1781                     |
| 10             | 10.7                  | 100445                      | 407.1781                     |
| 11             | 10.8                  | 33462                       | 251.0882                     |
| 12             | 10.8                  | 82873                       | 407.1781                     |
| 13             | 10.9                  | 91583                       | 237.0726                     |
| 14             | 11.2                  | 68244                       | 407.1781                     |
| 15             | 11.8                  | 23033                       | 407.1781                     |
| 16             | 11.9                  | 21157                       | 407.1781                     |
| 17             | 12.2                  | 54770                       | 251.0882                     |
| 18             | 12.4                  | 12759                       | 407.1781                     |
| 19             | 13.5                  | 10320                       | 407.1781                     |
| 20             | 15.0                  | 10622                       | 407.1781                     |
| 21             | 15.4                  | 4124                        | 407.1781                     |
| 22             | 16.0                  | 11161                       | 407.1781                     |
| 23             | 16.6                  | 2965                        | 407.1781                     |
| 24             | 19.4                  | 4069                        | 407.1781                     |

<sup>a</sup> Starting material (Met derivative 1); <sup>b</sup> retention time; <sup>c</sup> relative values.

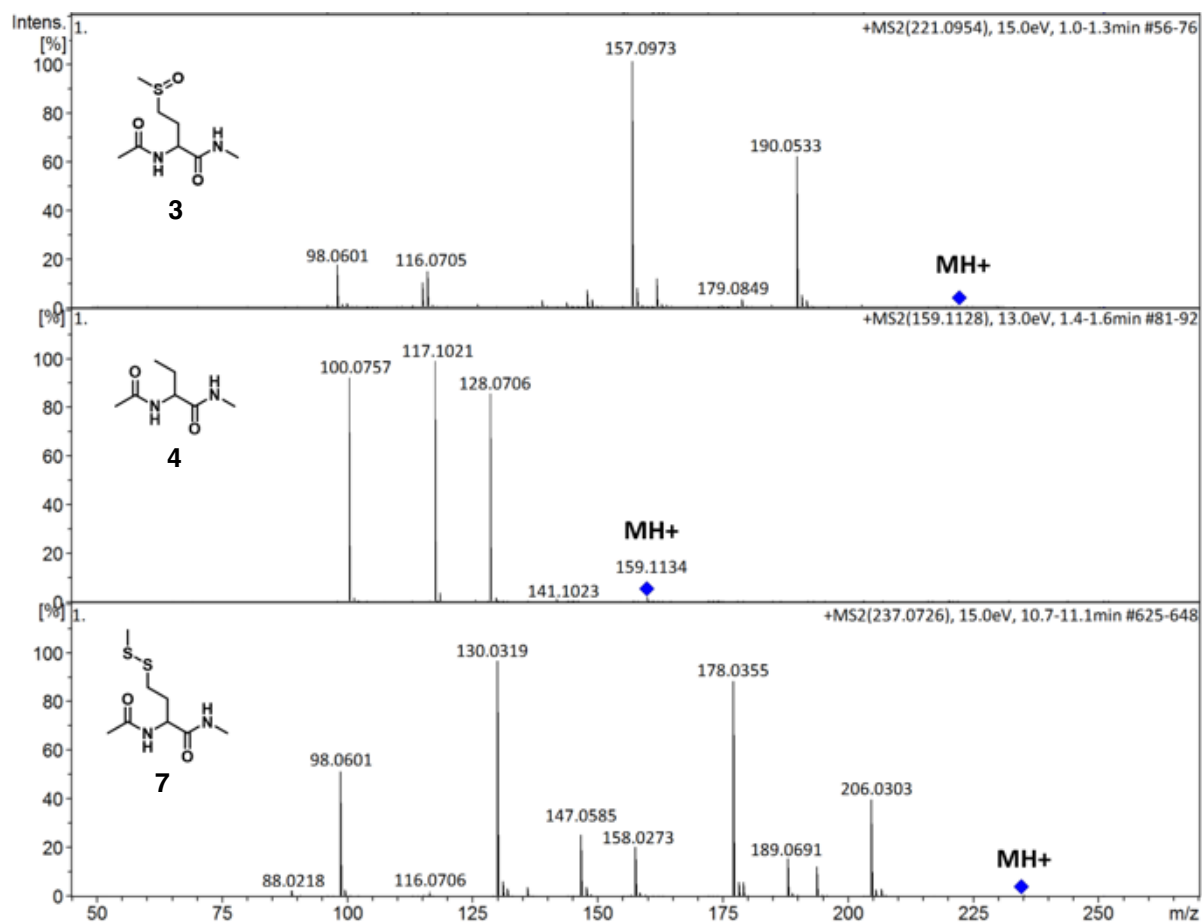

**Figure S3.** High-resolution MS/MS spectra of sulfoxide **3** ( $m/z$  221.0954),  $\alpha$ -aminobutyric derivative **4** ( $m/z$  159.1134) and disulfide **7** ( $m/z$  237.0726).

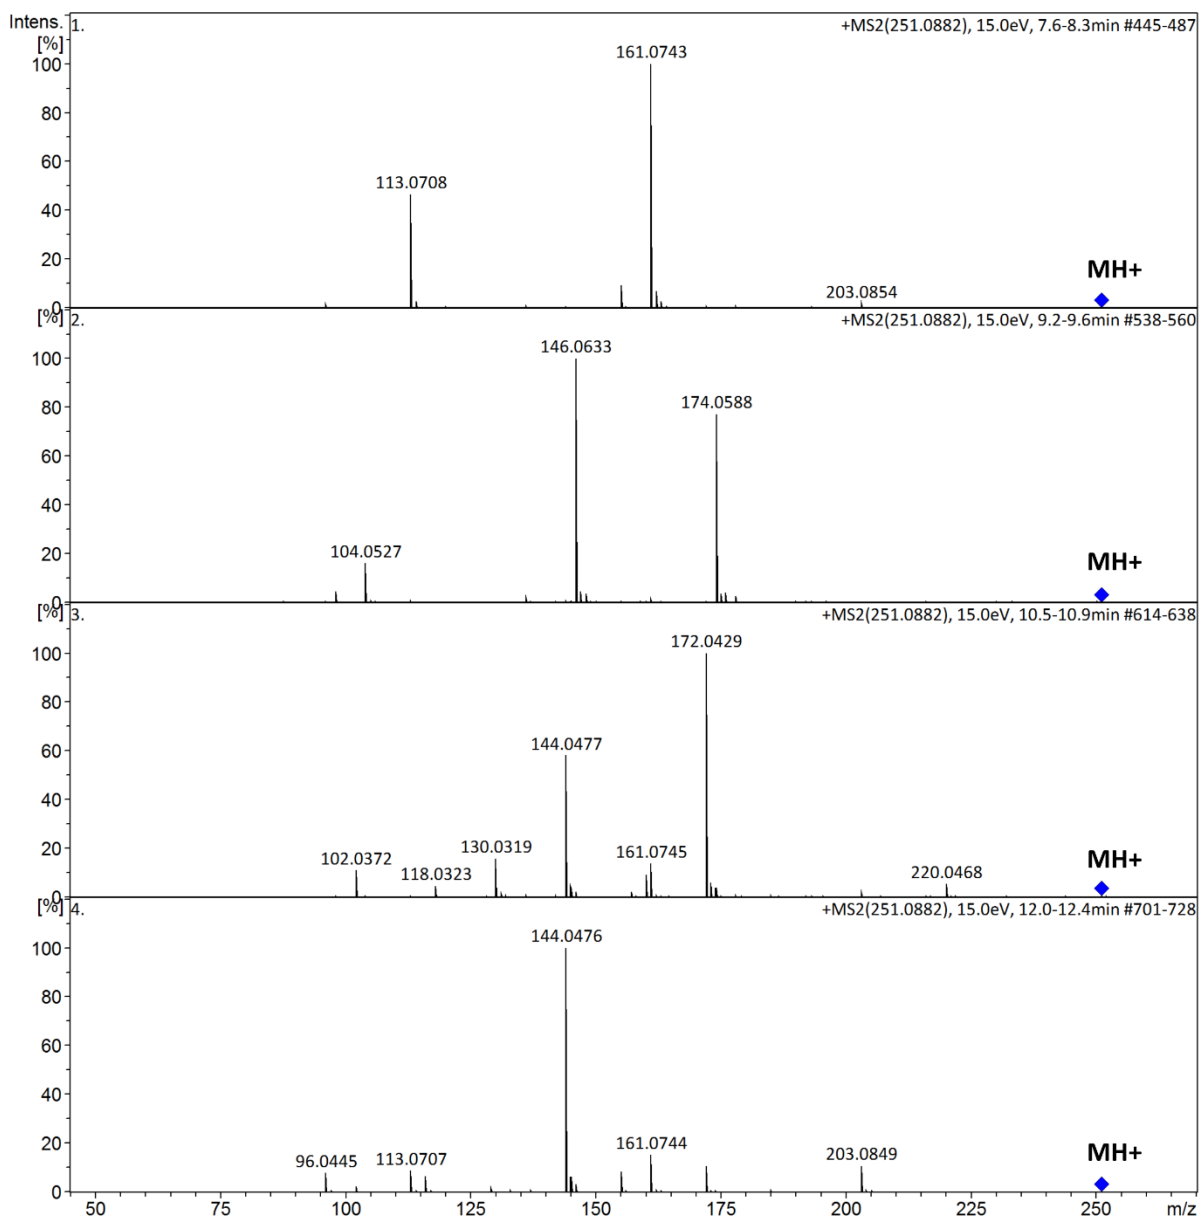

**Figure S4.** High-resolution MS/MS spectra of four products having  $m/z$  251.0882 (see Table S1) assigned to the cross-termination of  $\alpha\text{C}(1)\cdot$ ,  $\alpha\text{C}(2)\cdot$ ,  $\alpha\text{S}(1)\cdot$  and  $\alpha\text{S}(2)\cdot$  with  $\text{CH}_3\text{S}\cdot$  (from the top to the bottom based on the analysis reported in Scheme S1).

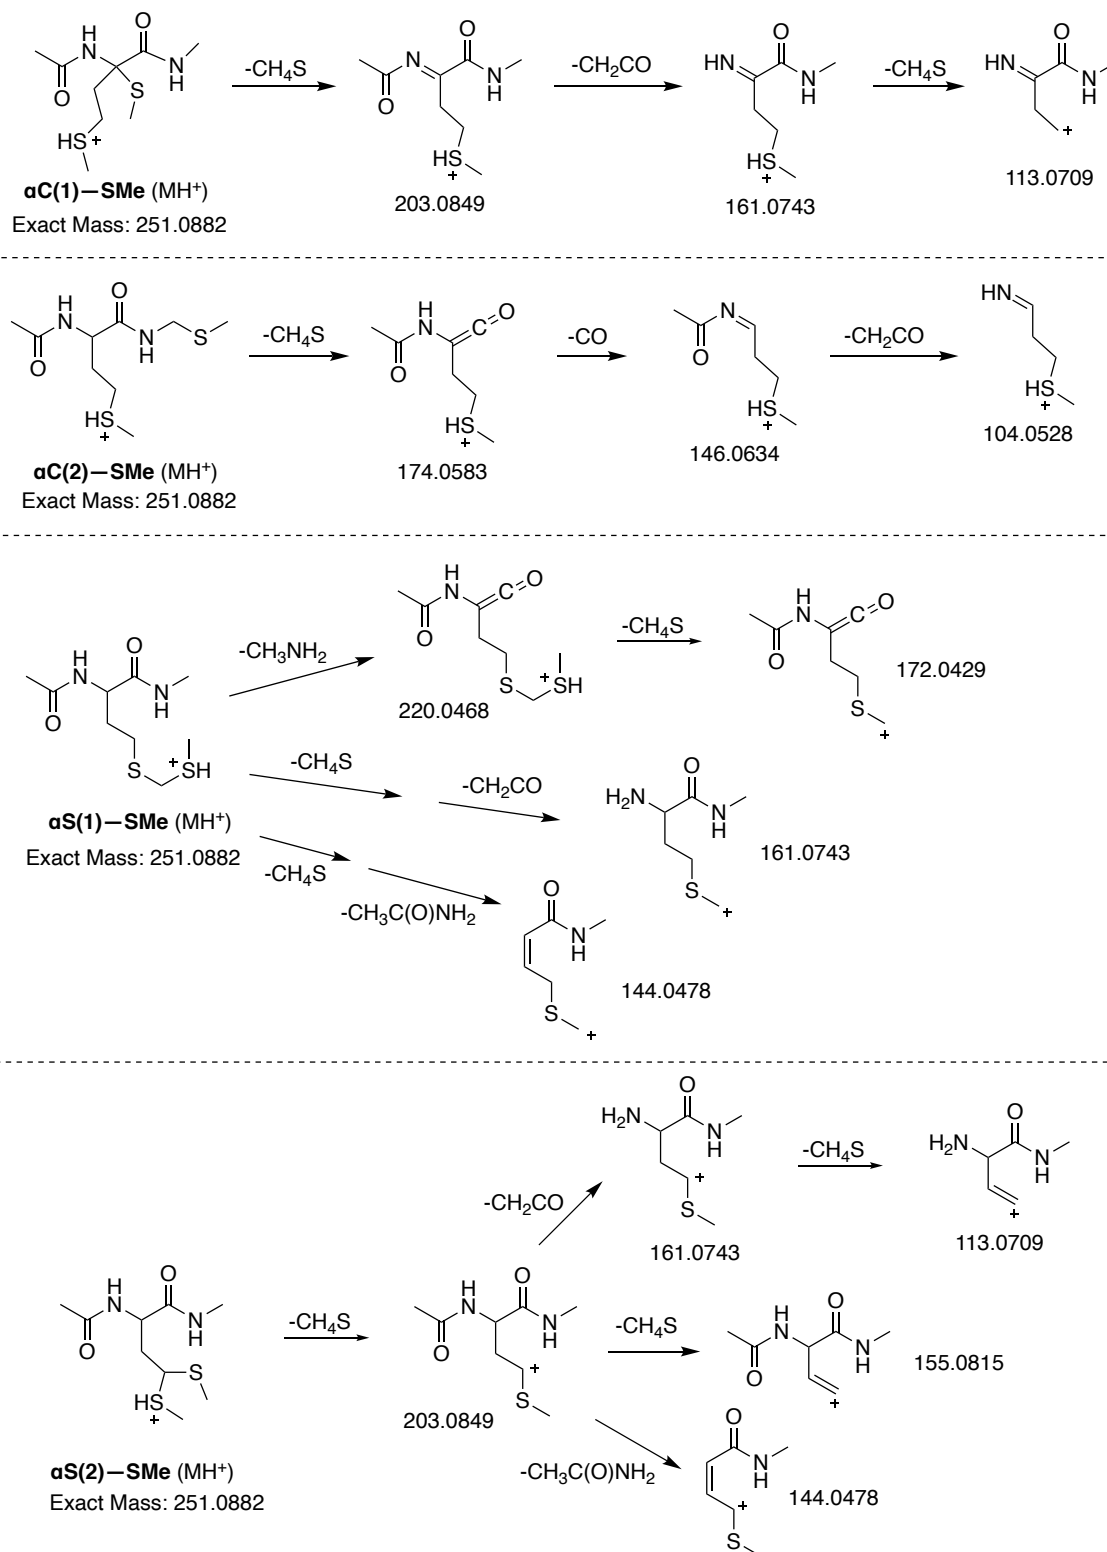

**Scheme S1.** Analysis of high-resolution MS/MS spectra of the four products having  $m/z$  251.0882 reported in Figure S4.

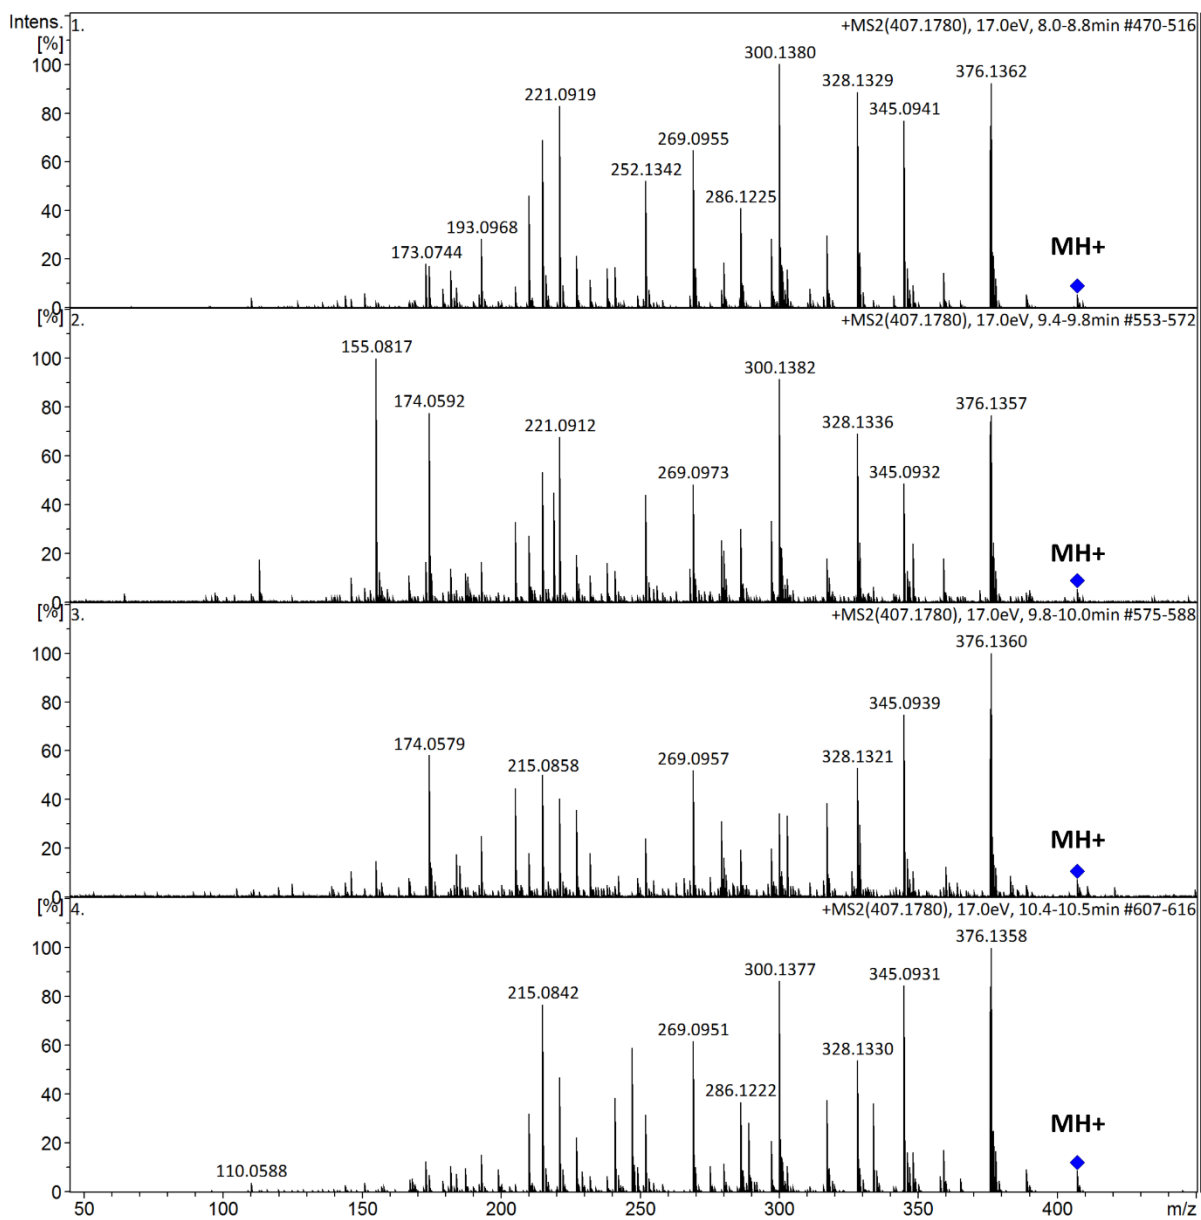

Figure S5 – panel A.



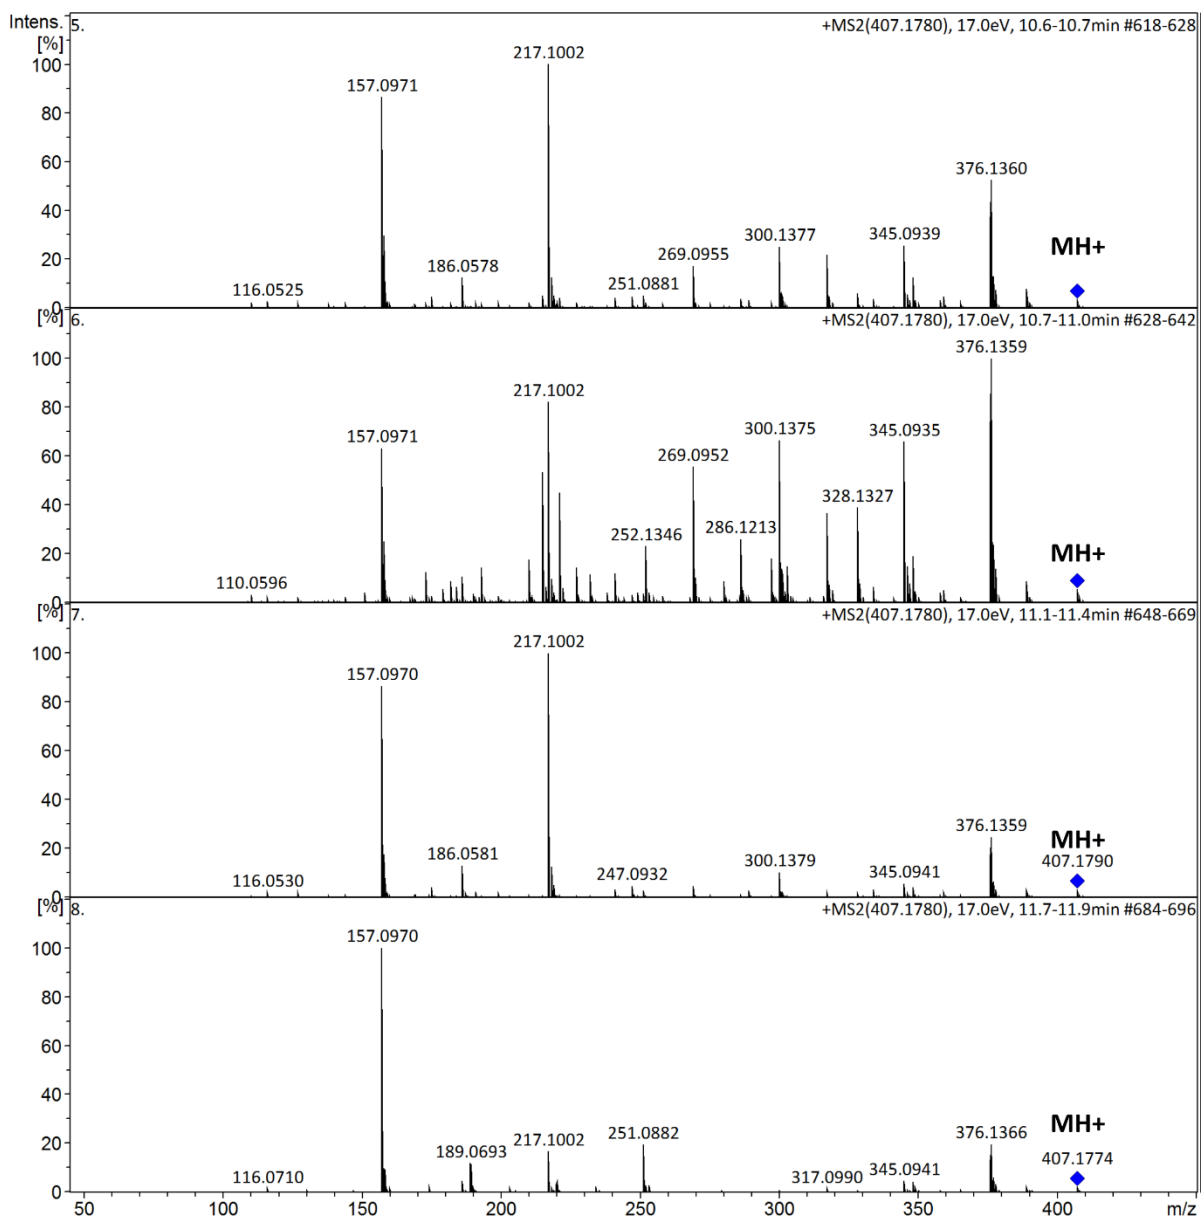

Figure S5 – panel B.

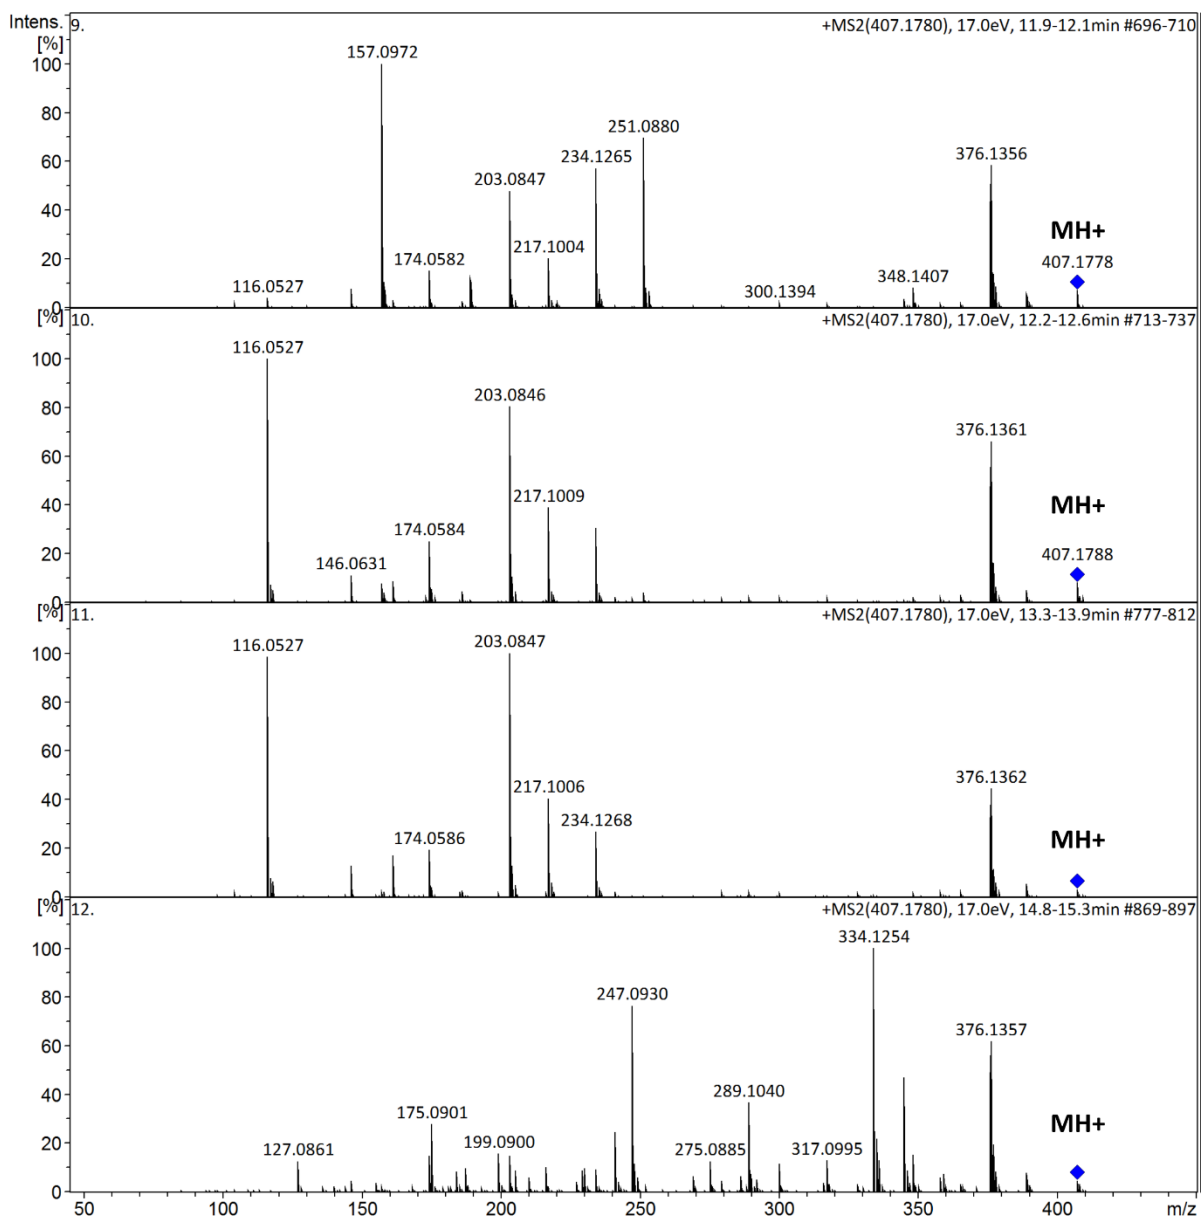

Figure S5 – panel C.

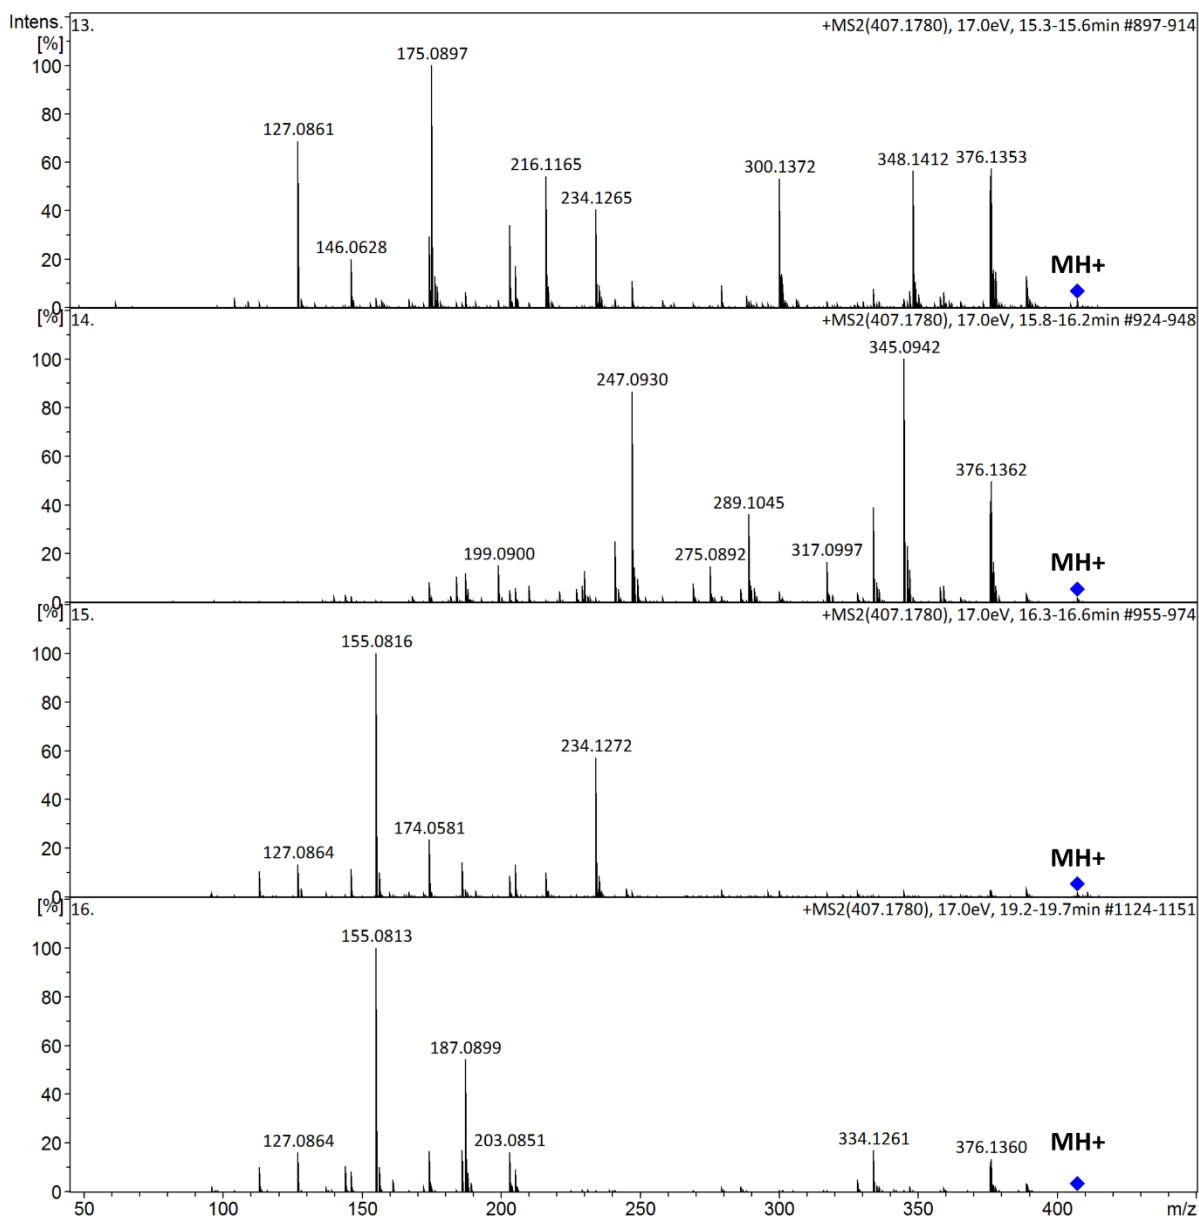

**Figure S5 – panel D.**

**Figure S5.** High-resolution MS/MS spectra of 16 products having  $m/z$  407.1781 (see Table S1) correspond to a molecular weight  $MH^+$  equivalent to two radicals ( $\alpha S^\bullet$  and/or  $\alpha C^\bullet$ ). The 16 spectra are shown in groups of 4 in the four panels A, B, C and D.

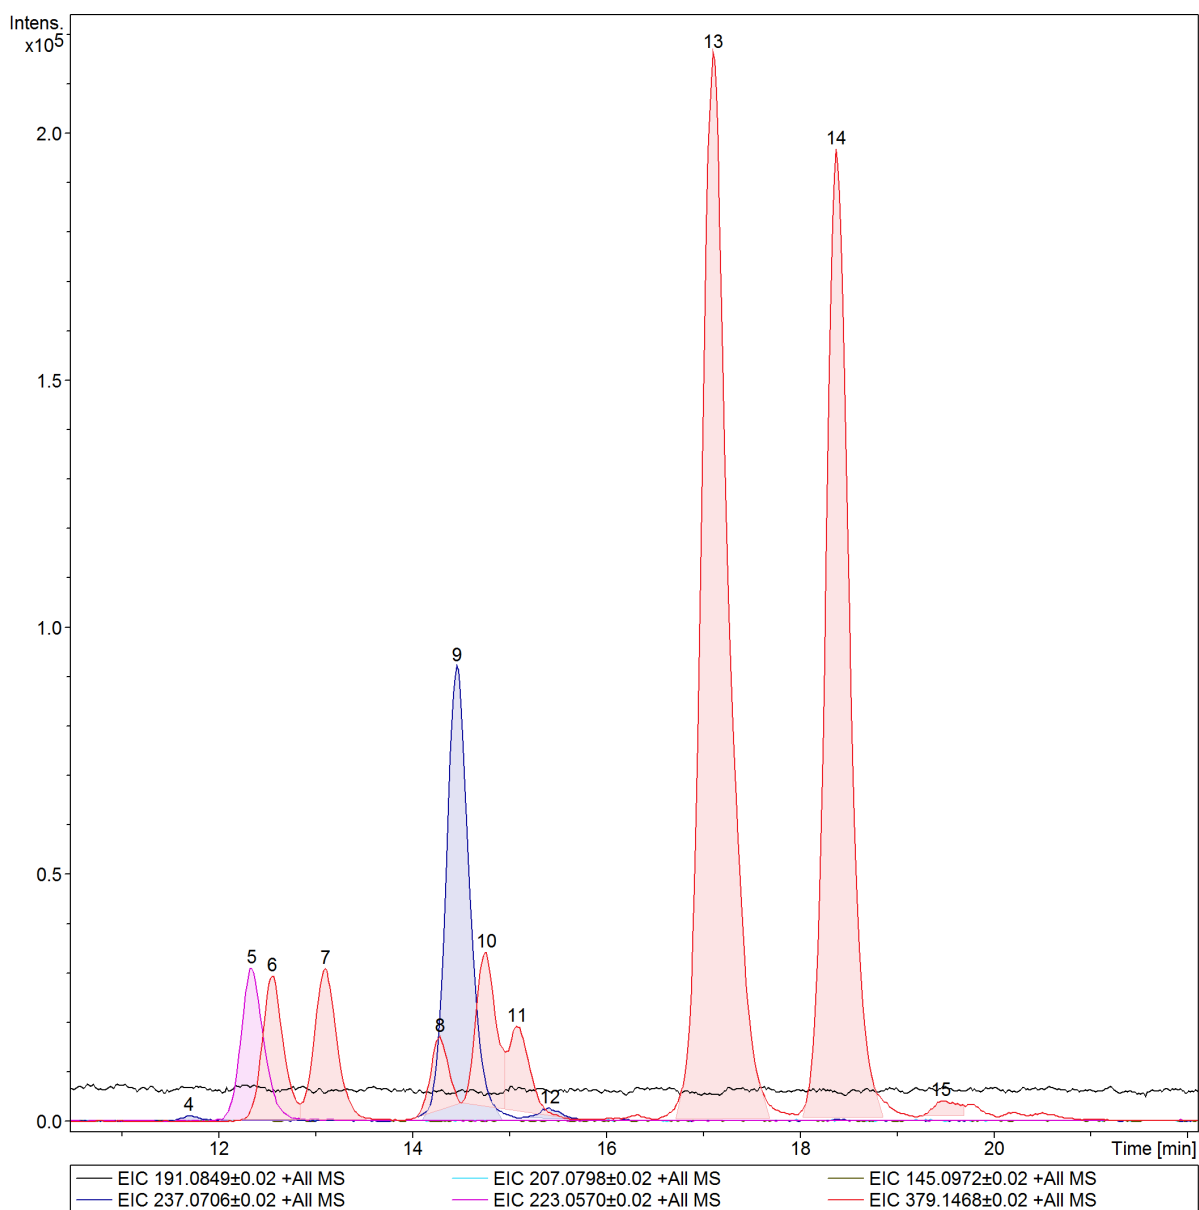

**Figure S6.** Fragments of LC-MS analysis for methylated Cys derivative **2** after irradiation at 800 Gy at pH 7.

**Table S2.** Conversion of Cys derivative **2** (peak 3) after irradiation at 800 Gy at pH 7. The peaks 4-15 are shown in Figure S5.

| Peak           | RT [min] <sup>b</sup> | Peak Intensity <sup>c</sup> | MH <sup>+</sup> , m/z |
|----------------|-----------------------|-----------------------------|-----------------------|
| 1              | 1.7                   | 335609                      | 207.0798              |
| 2              | 1.8                   | 17404                       | 145.0972              |
| 3 <sup>a</sup> | 4.4                   | 2099126                     | 191.0849              |
| 4              | 11.7                  | 1153                        | 237.0706              |
| 5              | 12.4                  | 30942                       | 223.0570              |
| 6              | 12.6                  | 29417                       | 379.1468              |
| 7              | 13.1                  | 30908                       | 379.1468              |
| 8              | 14.3                  | 17094                       | 379.1468              |
| 9              | 14.5                  | 92186                       | 237.0706              |
| 10             | 14.8                  | 34178                       | 379.1468              |
| 11             | 15.1                  | 19134                       | 379.1468              |
| 12             | 15.4                  | 2605                        | 237.0706              |
| 13             | 17.1                  | 216303                      | 379.1468              |
| 14             | 18.4                  | 196846                      | 379.1468              |
| 15             | 19.5                  | 4144                        | 379.1468              |

<sup>a</sup> Starting material (Cys derivative **2**); <sup>b</sup> retention time; <sup>c</sup> relative values.

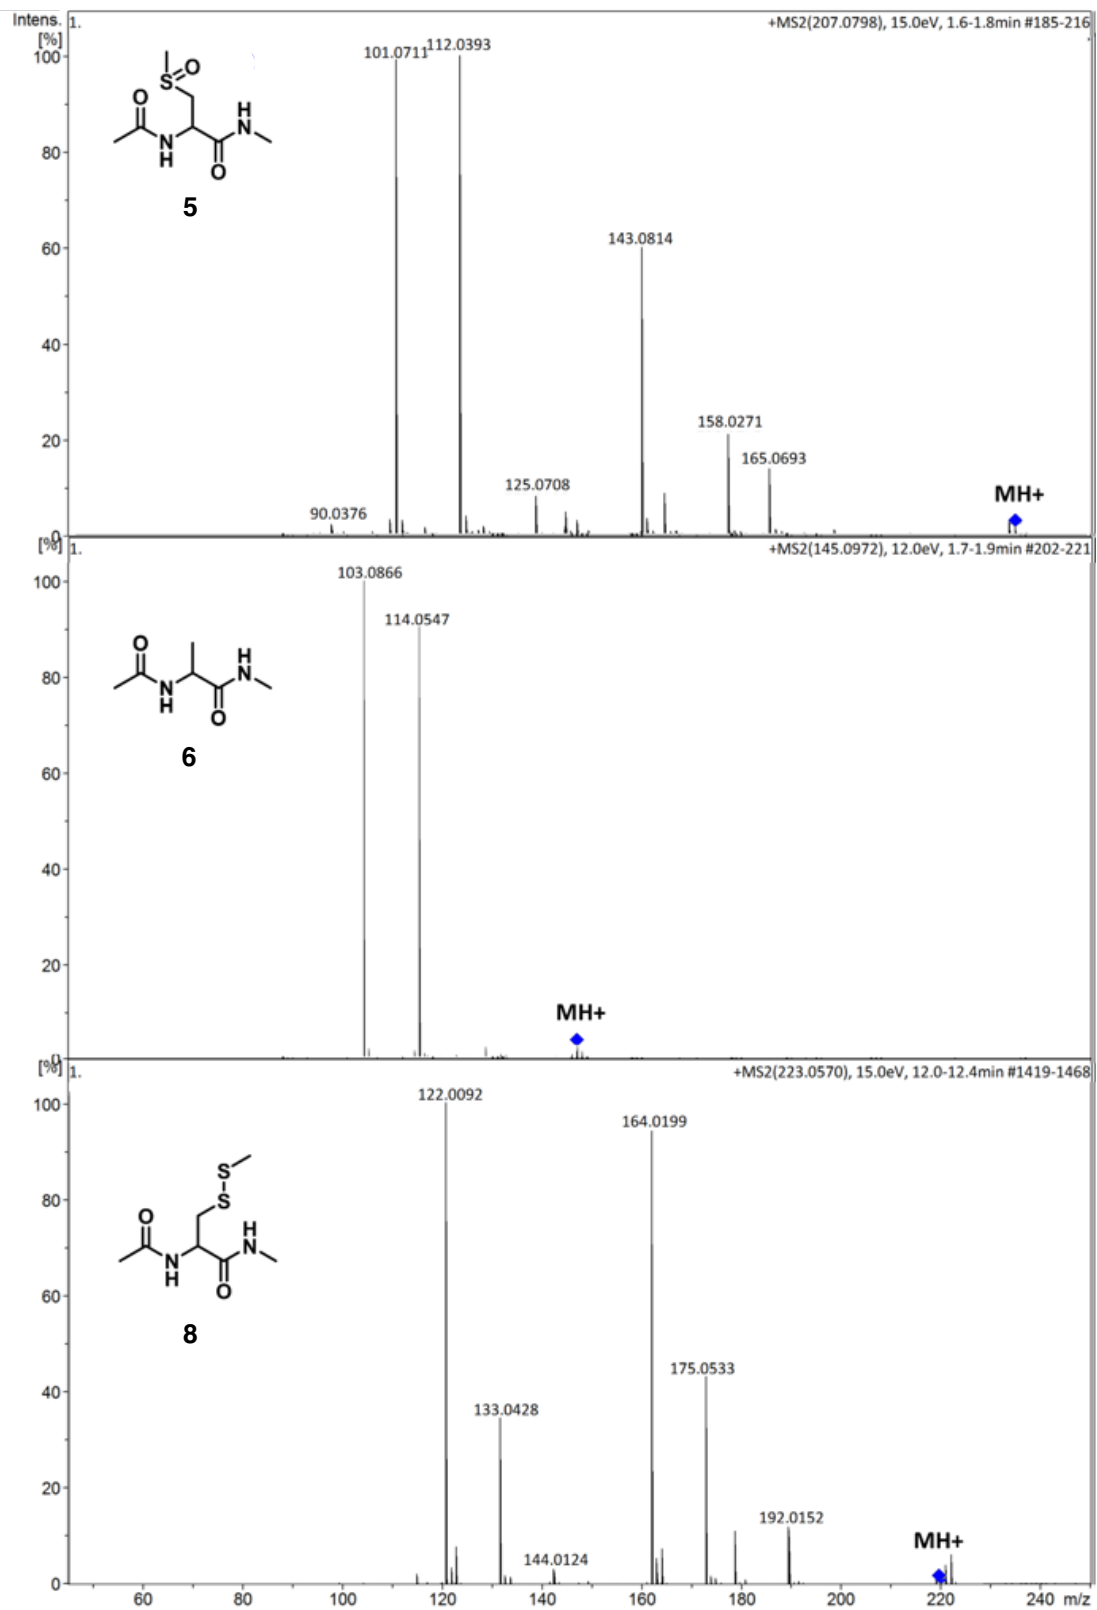

**Figure S7.** High-resolution MS/MS spectra of sulfoxide **5** ( $m/z$  207.0798), alanine derivative **6** ( $m/z$  145.0972) and disulfide **8** ( $m/z$  223.0570).

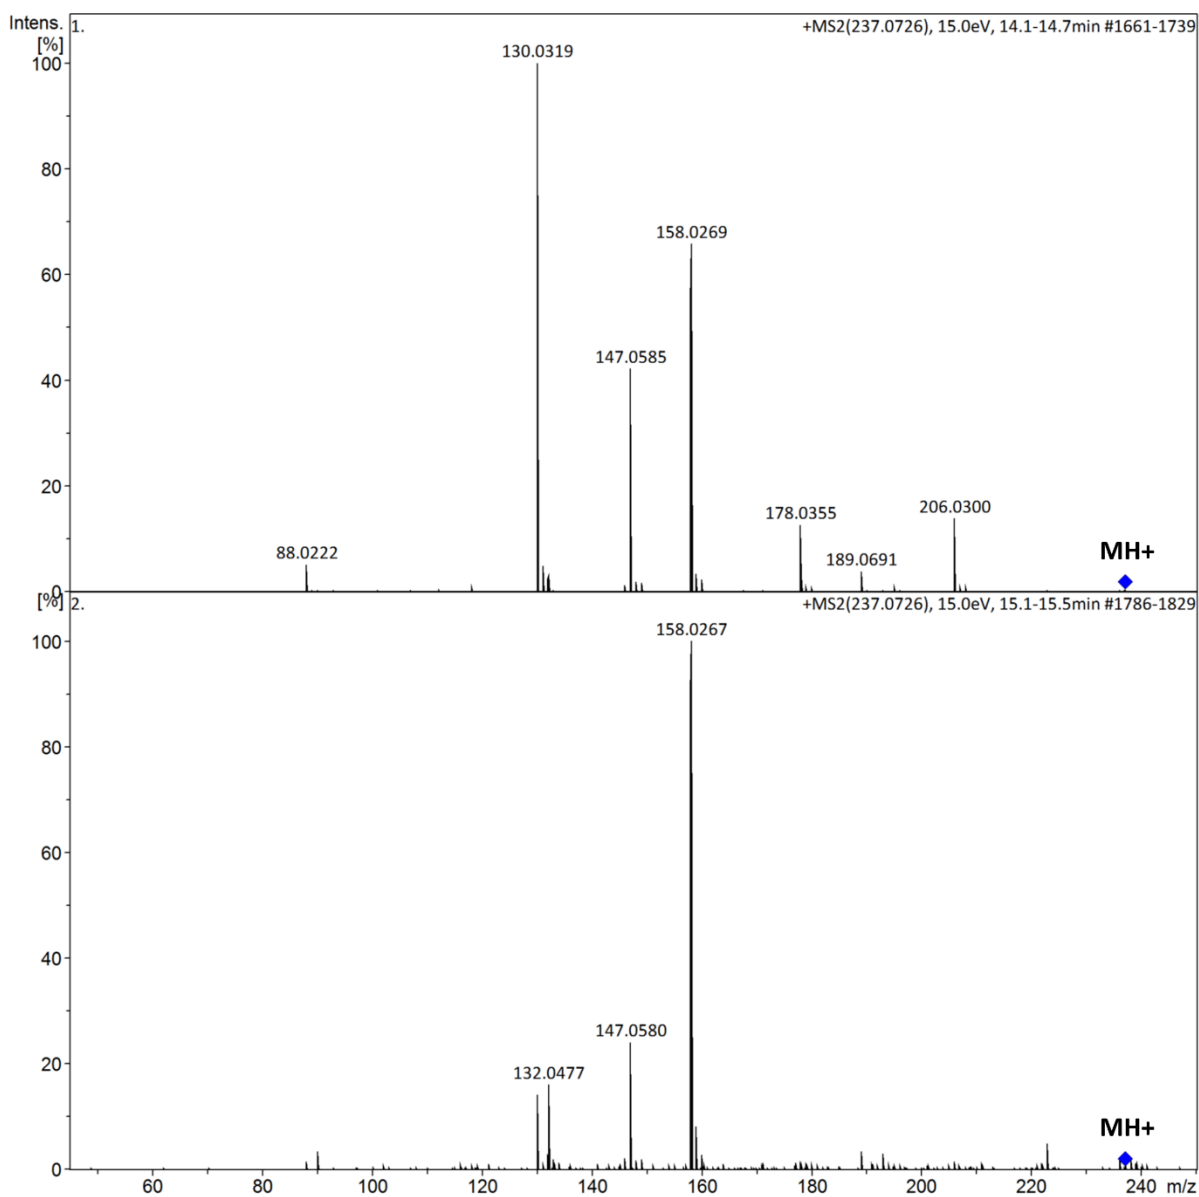

**Figure S8.** High-resolution MS/MS spectra of two of three products having  $m/z$  237.0726; the third peak at RT 11.7 min have too low intensity to be registered (see Table S2). All of them are assigned to the cross-termination of  $\alpha\text{C}(2)\cdot$ ,  $\alpha\text{S}(1)\cdot$  and  $\alpha\text{S}(2)\cdot$  with  $\text{CH}_3\text{S}\cdot$ , the most intense peak at RT 14.5 min is assigned to  $\alpha\text{S}(2)-\text{SCH}_3$  (Scheme S2).

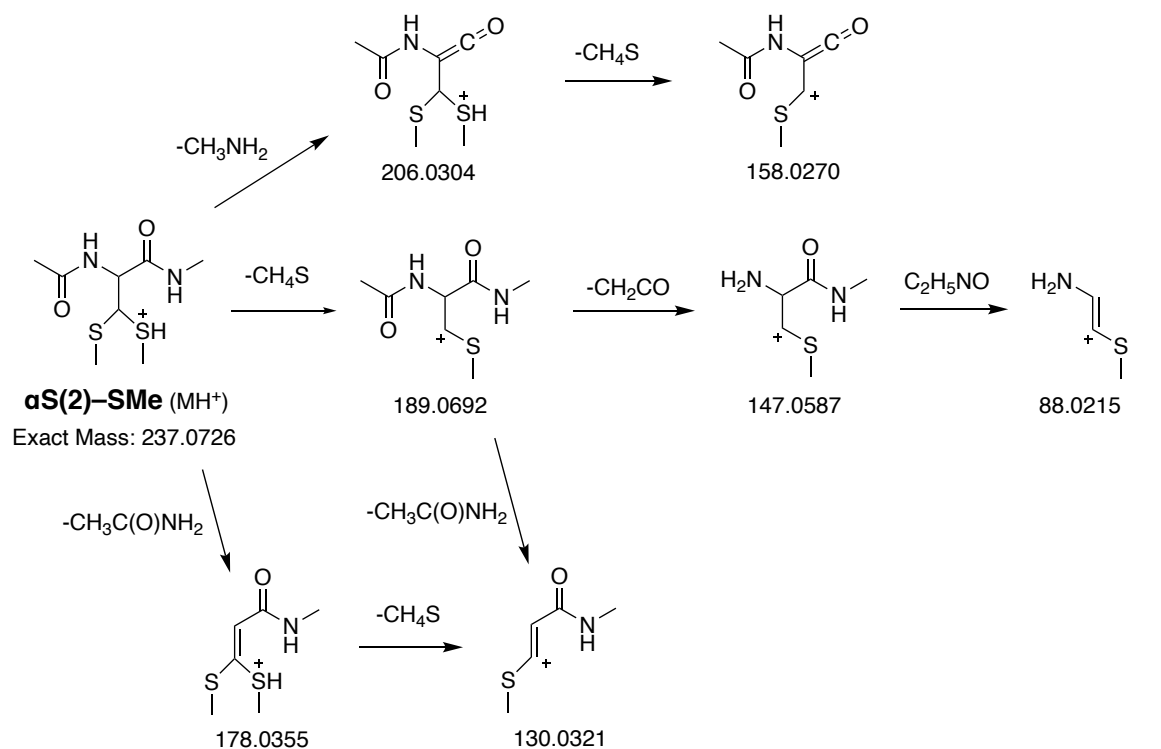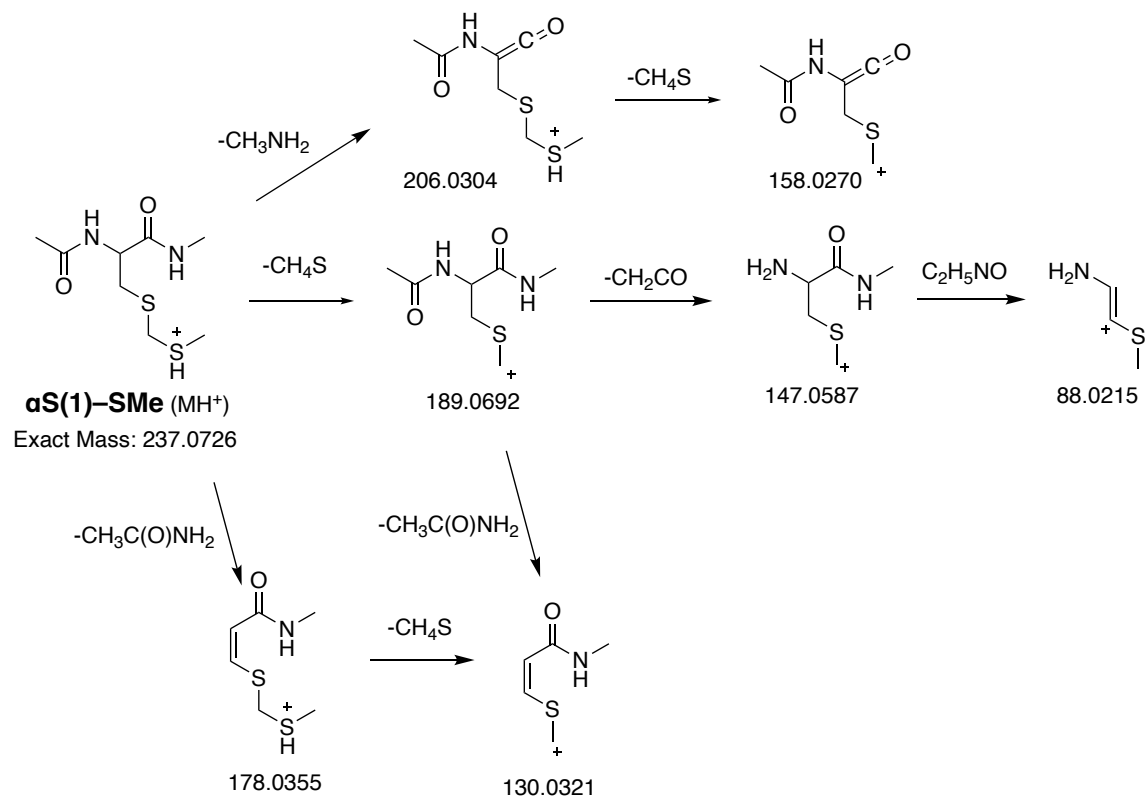

**Scheme S2.** Analysis of high-resolution MS/MS spectra of the main product at RT 14.5 min having  $m/z$  237.0726 (see Figure S7 upper part) fits very well with both  $\alpha\text{S}(2)\text{-SCH}_3$  and  $\alpha\text{S}(1)\text{-SCH}_3$



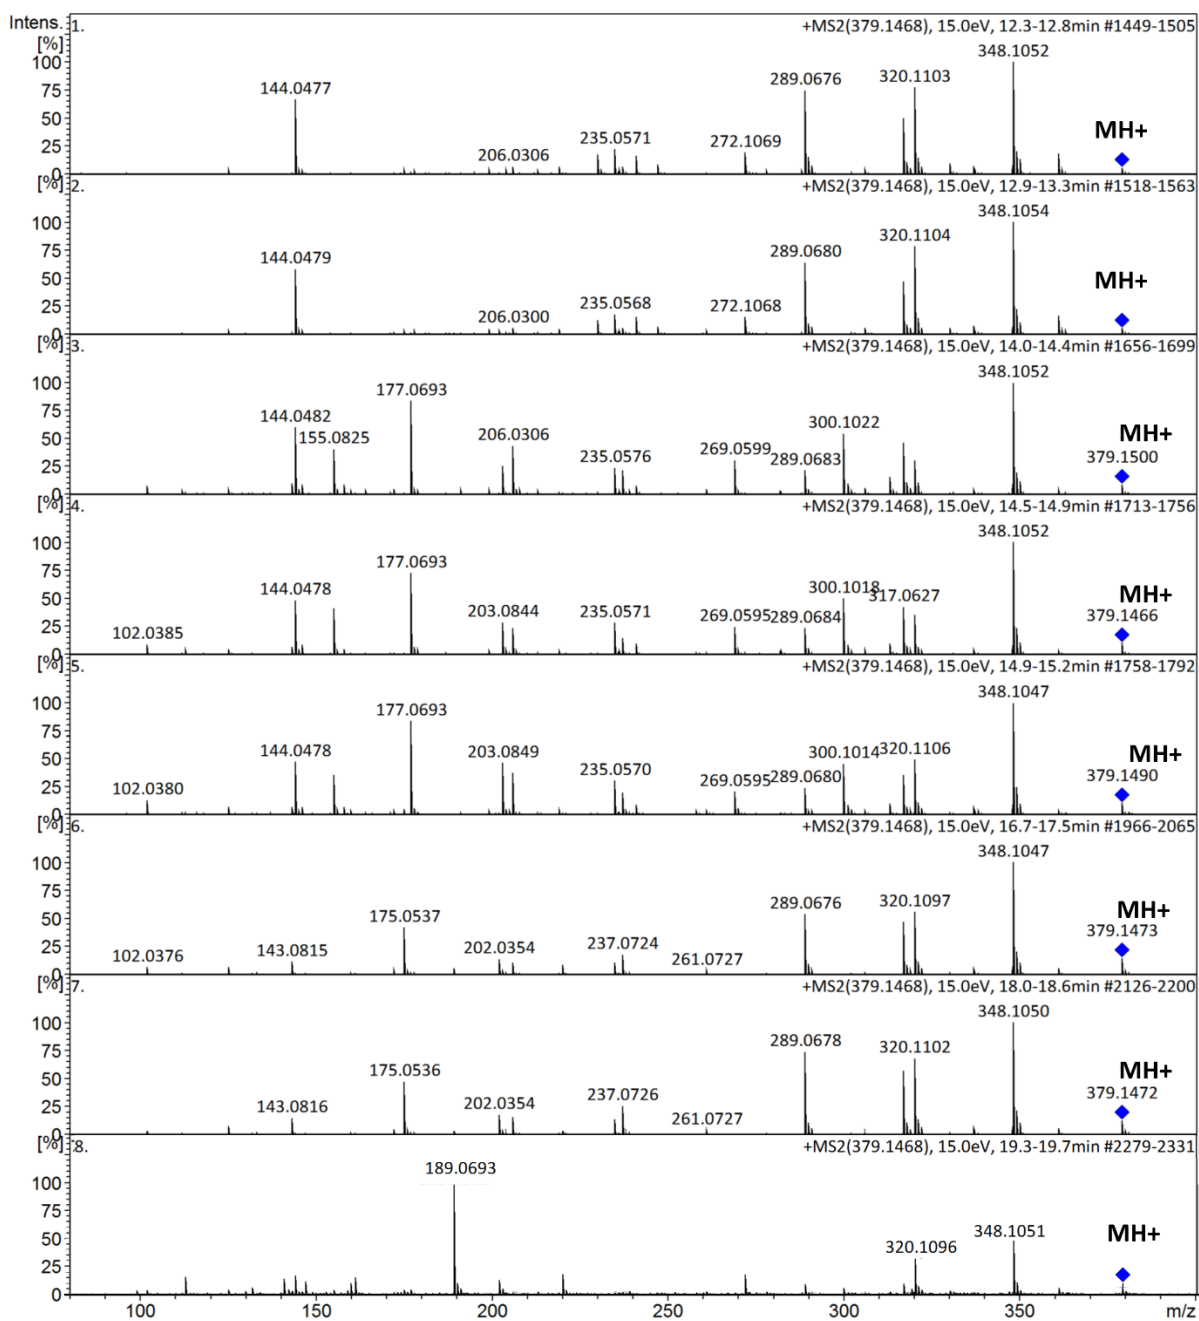

**Figure S9.** High-resolution MS/MS spectra of 8 products having  $m/z$  379.1468 (see Table S1) corresponding to a molecular weight  $MH^+$  equivalent to two radicals ( $\alpha S^\bullet$  and/or  $\alpha C^\bullet$ ).
